# Supplementary material
Source: PubMed Central journal article supplement (PMC4471174)
Supplement: NIHMS698586-supplement-01.pdf [file NIHMS698586-supplement-01.pdf]

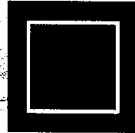

THE JOURNAL OF  
**CLINICAL PSYCHIATRY**  
THE OFFICIAL JOURNAL OF THE AMERICAN SOCIETY OF CLINICAL PSYCHOPHARMACOLOGY

**Supplementary Material**

**Article Title:** Prognostic Subgroups for Citalopram Response in the STAR\*D Trial

**Author(s):** Ewgeni Jakubovski, MA, and Michael H. Bloch, MD, MS

**DOI Number:** 10.4088/JCP.13m08727

**List of Supplementary Material for the article**

1. **eTable 1** Statistical characteristics of receiver operating characteristic analysis models

**Disclaimer**

This Supplementary Material has been provided by the author(s) as an enhancement to the published article. It has been approved by peer review; however, it has undergone neither editing nor formatting by in-house editorial staff. The material is presented in the manner supplied by the author.

Supplementary eTable 1. Statistical characteristics of receiver operating characteristic analysis models.

| Baseline Remission |                       |           |          |         |            |      |      |             |             |
|--------------------|-----------------------|-----------|----------|---------|------------|------|------|-------------|-------------|
| Node               | Variable              | Cut point | $\chi^2$ | p       | prevalence | PPV  | NPV  | sensitivity | specificity |
| 1                  | Employment status     | 1.00      | 78.08    | 0.00000 | 0.41       | 0.48 | 0.70 | 0.73        | 0.44        |
| 2                  | Income category       | 3.00      | 24.41    | 0.00000 | 0.48       | 0.57 | 0.56 | 0.39        | 0.72        |
| 3                  | Years of education    | 14.00     | 13.65    | 0.00012 | 0.30       | 0.37 | 0.75 | 0.51        | 0.62        |
| 4                  | Sex                   | 1.00      | 7.51     | 0.00341 | 0.57       | 0.62 | 0.51 | 0.65        | 0.47        |
| 5                  | Length of illness     | 11.93     | 20.30    | 0.00000 | 0.44       | 0.51 | 0.63 | 0.56        | 0.58        |
| 6                  | Age                   | 35.53     | 8.86     | 0.00160 | 0.36       | 0.48 | 0.68 | 0.39        | 0.76        |
| 7                  | SAD diagnosis         | 1.00      | 14.08    | 0.00009 | 0.25       | 0.30 | 0.85 | 0.81        | 0.36        |
| Baseline Response  |                       |           |          |         |            |      |      |             |             |
| Node               | Variable              | Cut point | $\chi^2$ | p       | prevalence | PPV  | NPV  | sensitivity | specificity |
| 1                  | Income category       | 1.00      | 77.70    | 0.00000 | 0.53       | 0.59 | 0.61 | 0.80        | 0.36        |
| 2                  | PTSD diagnosis        | 1.00      | 33.27    | 0.00000 | 0.59       | 0.62 | 0.57 | 0.89        | 0.21        |
| 3                  | GAD diagnosis         | 1.00      | 26.25    | 0.00000 | 0.39       | 0.44 | 0.79 | 0.87        | 0.30        |
| 4                  | Income category       | 3.00      | 17.28    | 0.00002 | 0.61       | 0.68 | 0.42 | 0.39        | 0.71        |
| 5                  | SAD diagnosis         | 1.00      | 7.97     | 0.00263 | 0.43       | 0.51 | 0.66 | 0.64        | 0.53        |
| 6                  | Age                   | 36.01     | 12.45    | 0.00022 | 0.44       | 0.55 | 0.61 | 0.43        | 0.72        |
| 7                  | Years of education    | 16.00     | 8.67     | 0.00178 | 0.21       | 0.46 | 0.82 | 0.29        | 0.90        |
| Week 2 Remission   |                       |           |          |         |            |      |      |             |             |
| Node               | Variable              | Cut point | $\chi^2$ | p       | prevalence | PPV  | NPV  | sensitivity | specificity |
| 1                  | Symptom improvement   | 3.00      | 66.10    | 0.00000 | 0.38       | 0.51 | 0.51 | 0.47        | 0.72        |
| 2                  | Years of education    | 15.00     | 17.86    | 0.00001 | 0.51       | 0.60 | 0.60 | 0.51        | 0.65        |
| 3                  | Income category       | 2.00      | 19.70    | 0.00000 | 0.31       | 0.37 | 0.37 | 0.59        | 0.55        |
| 4                  | Income category       | 3.00      | 9.83     | 0.00094 | 0.60       | 0.71 | 0.71 | 0.49        | 0.70        |
| 5                  | Side effect intensity | 3.00      | 13.99    | 0.00010 | 0.43       | 0.50 | 0.50 | 0.80        | 0.39        |
| 6                  | Side effect burden    | 2.00      | 15.87    | 0.00004 | 0.37       | 0.44 | 0.44 | 0.70        | 0.46        |
| 7                  | Age                   | 33.40     | 10.16    | 0.00078 | 0.26       | 0.34 | 0.34 | 0.41        | 0.73        |
| Week 2 Response    |                       |           |          |         |            |      |      |             |             |
| Node               | Variable              | Cut point | $\chi^2$ | p       | prevalence | PPV  | NPV  | sensitivity | specificity |
| 1                  | Symptom improvement   | 2.00      | 49.88    | 0.00000 | 0.48       | 0.56 | 0.61 | 0.60        | 0.58        |
| 2                  | Side effect intensity | 3.00      | 24.55    | 0.00000 | 0.56       | 0.63 | 0.55 | 0.71        | 0.46        |
| 3                  | Income category       | 2.00      | 24.68    | 0.00000 | 0.39       | 0.48 | 0.69 | 0.60        | 0.58        |
| 4                  | Income category       | 1.00      | 18.55    | 0.00001 | 0.63       | 0.68 | 0.53 | 0.80        | 0.37        |
| 5                  | Years of education    | 16.00     | 13.09    | 0.00016 | 0.45       | 0.59 | 0.63 | 0.48        | 0.72        |
| 6                  | Side effect burden    | 2.00      | 14.70    | 0.00007 | 0.48       | 0.56 | 0.64 | 0.70        | 0.49        |
| 7                  | Age                   | 33.40     | 8.32     | 0.00216 | 0.31       | 0.41 | 0.74 | 0.39        | 0.75        |
| Week 4 Remission   |                       |           |          |         |            |      |      |             |             |
| Node               | Variable              | Cut point | $\chi^2$ | p       | prevalence | PPV  | NPV  | sensitivity | specificity |
| 1                  | Symptom               | 3.00      | 61.39    | 0.00000 | 0.32       | 0.44 | 0.77 | 0.77        | 0.64        |

|                        | improvement           |                  |                            |          |                   |            |            |                    |                    |
|------------------------|-----------------------|------------------|----------------------------|----------|-------------------|------------|------------|--------------------|--------------------|
| 2                      | Income category       | 2.00             | 17.32                      | 0.00002  | 0.44              | 0.53       | 0.65       | 0.65               | 0.56               |
| 3                      | Symptom improvement   | 2.00             | 13.17                      | 0.00015  | 0.23              | 0.31       | 0.81       | 0.81               | 0.68               |
| 4                      | Sex                   | 1.00             | 12.99                      | 0.00017  | 0.53              | 0.61       | 0.61       | 0.61               | 0.49               |
| 5                      | Income category       | 1.00             | 8.81                       | 0.00164  | 0.35              | 0.44       | 0.74       | 0.74               | 0.56               |
| 6                      | Side effect frequency | 2.00             | 6.04                       | 0.00793  | 0.31              | 0.38       | 0.76       | 0.76               | 0.55               |
| 7                      | Income category       | 3.00             | 10.38                      | 0.00069  | 0.19              | 0.31       | 0.84       | 0.84               | 0.83               |
| <b>Week 4 Response</b> |                       |                  |                            |          |                   |            |            |                    |                    |
| <b>Node</b>            | <b>Variable</b>       | <b>Cut point</b> | <b><math>\chi^2</math></b> | <b>p</b> | <b>prevalence</b> | <b>PPV</b> | <b>NPV</b> | <b>sensitivity</b> | <b>specificity</b> |
| 1                      | Symptom improvement   | 3.00             | 51.06                      | 0.00000  | 0.42              | 0.59       | 0.59       | 0.42               | 0.79               |
| 2                      | Side effect burden    | 2.00             | 9.62                       | 0.00105  | 0.59              | 0.66       | 0.66       | 0.72               | 0.46               |
| 3                      | Income category       | 2.00             | 11.77                      | 0.00032  | 0.35              | 0.41       | 0.41       | 0.59               | 0.55               |
| 4                      | Side effect frequency | 1.00             | 6.19                       | 0.00725  | 0.66              | 0.73       | 0.73       | 0.63               | 0.56               |
| 5                      | Side effect intensity | 3.00             | 5.45                       | 0.01119  | 0.47              | 0.59       | 0.59       | 0.62               | 0.61               |
| 6                      | Side effect frequency | 3.00             | 7.59                       | 0.00326  | 0.41              | 0.47       | 0.47       | 0.70               | 0.44               |
| 7                      | Symptom improvement   | 2.00             | 12.26                      | 0.00025  | 0.28              | 0.41       | 0.41       | 0.44               | 0.75               |

PPV=positive predictive value; NPV=negative predictive value
